# Supplementary material
Source: Springer Nature journal article supplement (https://www.springermedizin.de/resource/supplementary/12961_2013_293_MOESM3_ESM.pdf/9570980)
Supplement: MOESM3 [file 9570980]

Country / regional reports  
(Africa, Latin America and the Caribbean, Middle East and North Africa, South East Asia, Western Pacific)

- Literature review
- Key informant interviews
- Definition of priorities

Global stakeholders interviews

Literature scoping  
compared with  
identified policy  
priorities

Formulation of  
research questions  
Ranking workshop

Ranked list of  
core research  
questions
